# Supplementary material
Source: PubMed Central journal article supplement (PMC6123314)
Supplement: NIHMS939570-supplement-supplement_1.pdf [file NIHMS939570-supplement-supplement_1.pdf]

**Supplementary Table 1. Patient, disease and treatment characteristic differences based on statin use**

| <b>Patient characteristics</b>        | <b>Statin at or prior to diagnosis</b> | <b>No statin at or prior to diagnosis</b> | <b><i>p</i></b> |
|---------------------------------------|----------------------------------------|-------------------------------------------|-----------------|
| <b>Age, years</b>                     |                                        |                                           |                 |
| Mean (SD)                             | 73 (11)                                | 68 (12)                                   | 0.003           |
| <b>Gender</b>                         |                                        |                                           |                 |
| Male                                  | 26 (44.1%)                             | 121 (51.9%)                               | 0.281           |
| Female                                | 33 (55.9%)                             | 112 (48.1%)                               |                 |
| <b>Race</b>                           |                                        |                                           |                 |
| Caucasian                             | 56 (98.2%)                             | 211 (95.0%)                               | 0.288           |
| Other                                 | 1 (1.8%)                               | 11 (5.0%)                                 |                 |
| <b>Body mass index</b>                |                                        |                                           |                 |
| Mean (SD)                             | 26.3 (6.0)                             | 25.3 (4.7)                                | 0.175           |
| <b>Comorbidities</b>                  |                                        |                                           |                 |
| Diabetes                              | 41 (69.5%)                             | 135 (57.9%)                               | 0.105           |
| Coronary artery disease               | 15 (25.4%)                             | 22 (9.4%)                                 | 0.001           |
| Hyperlipidemia                        | 44 (74.6%)                             | 29 (12.4%)                                | <0.001          |
| Hypertension                          | 50 (84.7%)                             | 157 (67.4%)                               | 0.009           |
| <b>Medications</b>                    |                                        |                                           |                 |
| Metformin                             | 15 (25.4%)                             | 26 (11.2%)                                | 0.005           |
| Pancreatic enzymes                    | 22 (37.3%)                             | 108 (42.4%)                               | 0.211           |
| Sulfonylurea                          | 8 (13.6%)                              | 15 (6.4%)                                 | 0.070           |
| Insulin                               | 36 (61.0%)                             | 122 (52.4%)                               | 0.233           |
| Glucocorticoid                        | 22 (37.3%)                             | 69 (29.6%)                                | 0.256           |
| Beta-blocker (before or at diagnosis) | 16 (27.1%)                             | 37 (15.9%)                                | 0.045           |
| Beta-blocker (active use)             | 21 (35.6%)                             | 86 (36.9%)                                | 0.851           |
| <b>Disease characteristics</b>        | <b>Statin at or prior to diagnosis</b> | <b>No statin at or prior to diagnosis</b> | <b><i>p</i></b> |
| <b>Lymph node status</b>              |                                        |                                           |                 |
| cN0                                   | 22 (40.0%)                             | 97 (42.9%)                                | 0.694           |
| cN+                                   | 33 (60.0%)                             | 129 (57.1%)                               |                 |
| <b>Resectability</b>                  |                                        |                                           |                 |
| Unresectable                          | 27 (47.4%)                             | 115 (49.6%)                               | 0.956           |
| Borderline resectable                 | 8 (14.0%)                              | 31 (13.4%)                                |                 |
| Resectable                            | 22 (38.6%)                             | 86 (37.1%)                                |                 |
| <b>Treatment characteristics</b>      | <b>Statin at or prior to diagnosis</b> | <b>No statin at or prior to diagnosis</b> | <b><i>p</i></b> |
| <b>Surgery</b>                        |                                        |                                           |                 |
| Yes                                   | 27 (45.8%)                             | 106 (45.5%)                               | 0.970           |
| No                                    | 32 (54.2%)                             | 127 (54.5%)                               |                 |
| <b>Immunotherapy</b>                  |                                        |                                           |                 |
| Yes                                   | 1 (1.7%)                               | 10 (4.3%)                                 | 0.700           |
| No                                    | 58 (98.3%)                             | 223 (95.7%)                               |                 |
| <b>Chemotherapy</b>                   |                                        |                                           |                 |
| Yes                                   | 43 (72.9%)                             | 196 (84.1%)                               | 0.045           |

|    |            |            |  |
|----|------------|------------|--|
| No | 16 (27.1%) | 37 (15.9%) |  |
|----|------------|------------|--|
